# Supplementary material for: Synthesis of recrystallized anatase TiO2 mesocrystals with Wulff shape assisted by oriented attachment
Source: Royal Society of Chemistry journal article supplement (doi:10.1039/c0nr01016b), 2011-01-01
Supplement: c0nr01016b.pdf [file c0nr01016b.pdf]

## SUPPORTING INFORMATION

# Synthesis of recrystallized anatase TiO<sub>2</sub> mesocrystal with Wulff shape assisted by oriented attachment

Rafael O. da Silva<sup>a</sup>, Ricardo H. Gonçalves<sup>a</sup>, Daniel G. Stroppa<sup>b</sup>, Antonio J. Ramirez<sup>b</sup> and Edson R. Leite<sup>a\*</sup>

<sup>a</sup>Chemistry Department, Federal University of São Carlos, São Carlos, SP, 13656-905, Brazil;

<sup>b</sup> Brazilian Synchrotron Light Laboratory, Campinas, SP, 13083-970, Brazil

\*derl@power.ufscar.br

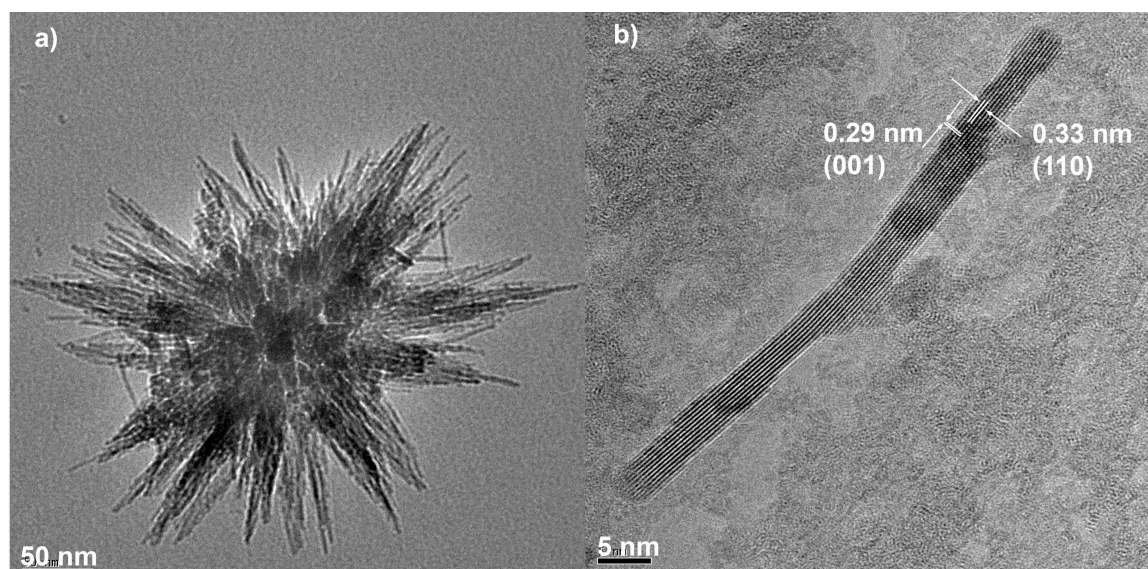

Figure S1 – a) Low magnification HRTEM image of the material synthesized at 100°C (24h of treatment time) with magnetic stirrer, showing a nanostructured material with fiber like morphology; b) High magnification HRTEM image showing a fiber in detail. The plane distance measured support the formation of TiO<sub>2</sub> rutile phase. XRD measurement of this sample confirms the formation of TiO<sub>2</sub> rutile phase (see Figure S2).

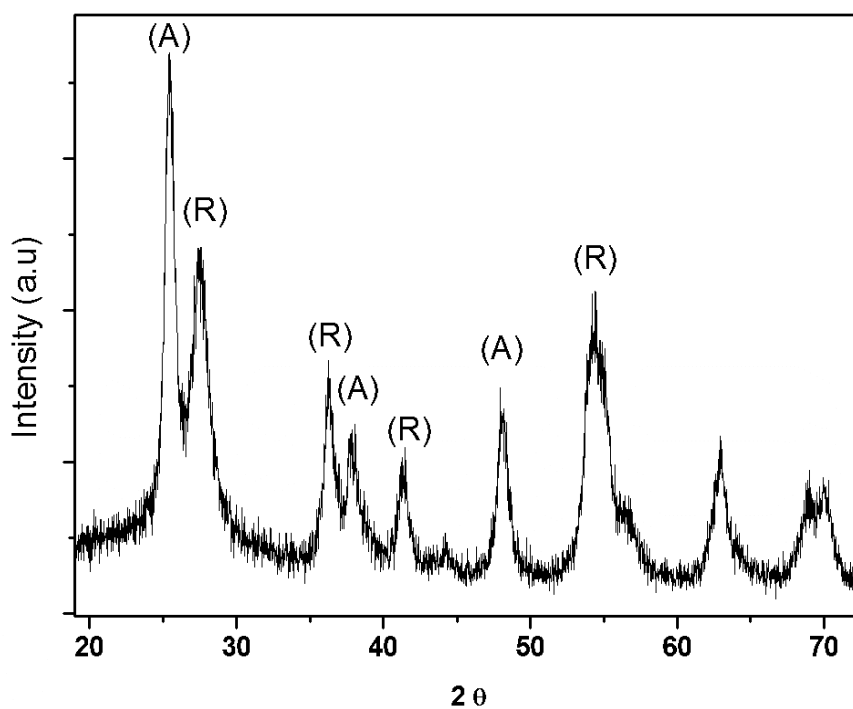

Figure S2 – XRD analysis of the material synthesized at 100°C (24h of treatment time) with magnetic stirrer, showing the formation of rutile TiO<sub>2</sub> phase. (A) = Anatase phase; (B) = Rutile phase.

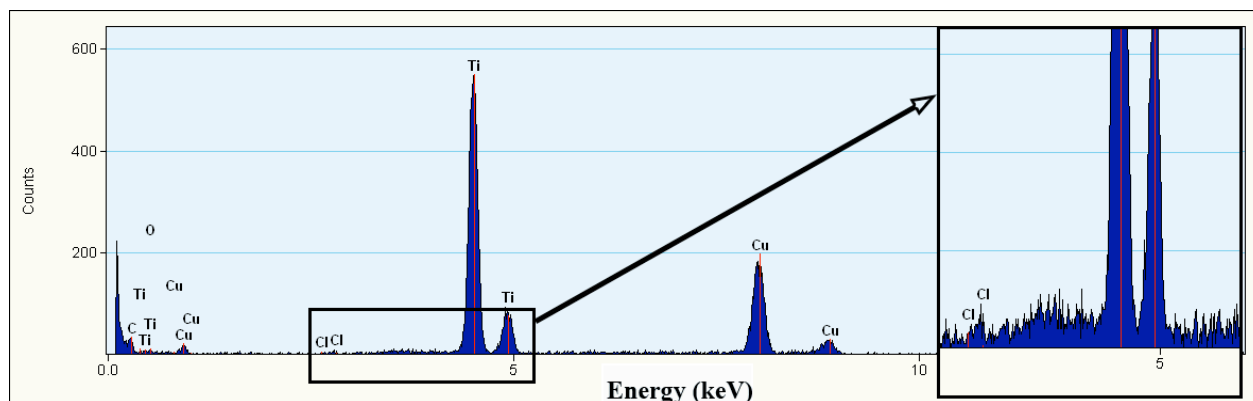

Figure S3 – TEM-EDS analysis of the material synthesized at 100°C (40h of treatment time), without magnetic stirrer. The inset shows in detail the energy region of Cl.
